# Supplementary material for: Large enhancement of ferroelectric polarization in Hf0.5Zr0.5O2 films by low plasma energy pulsed laser deposition
Source: Royal Society of Chemistry journal article supplement (doi:10.1039/d1tc05387f), 2021-12-07
Supplement: d1tc05387f1.pdf [file d1tc05387f1.pdf]

## Electronic Supplementary Information

### **Large enhancement of ferroelectric polarization in $\text{Hf}_{0.5}\text{Zr}_{0.5}\text{O}_2$ films by low plasma energy pulsed laser deposition**

Tingfeng Song,<sup>a</sup> Raul Solanas,<sup>a</sup> Mengdi Qian,<sup>a</sup> Ignasi Fina,<sup>\*a</sup> and Florencio Sánchez<sup>\*a</sup>

<sup>a</sup> Institut de Ciència de Materials de Barcelona (ICMAB-CSIC), Campus UAB, Bellaterra  
08193, Barcelona, Spain

\* ifina@icmab.es, fsanchez@icmab.es

### S1: Sketches of the $P_{Ar}$ and $P_{O_2}$ partial pressures used to grow the films

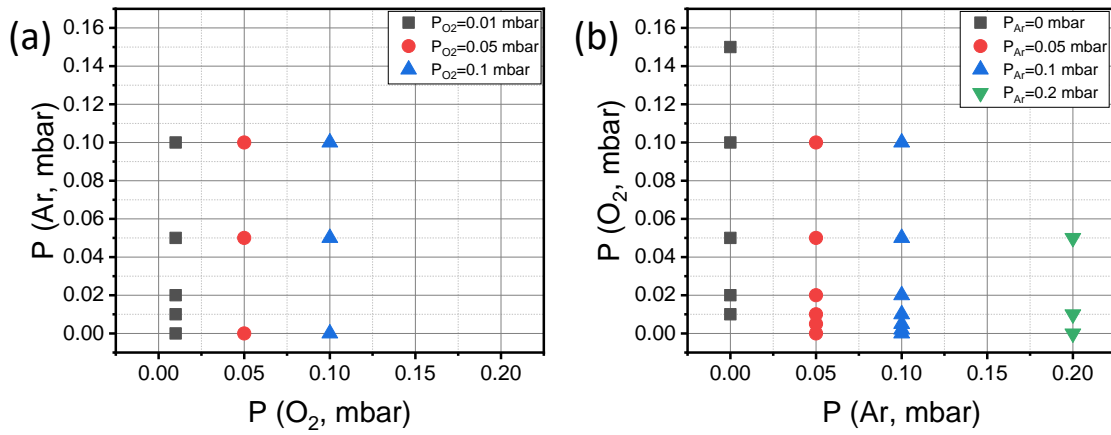

**Figure S1.** In (a) the three series of films deposited at fixed  $P_{O_2}$  are plotted using black squares ( $P_{O_2} = 0.01$  mbar), red circles ( $P_{O_2} = 0.05$  mbar), and blue up triangles ( $P_{O_2} = 0.1$  mbar). In (b) the four series of films deposited at fixed  $P_{Ar}$  are plotted using black squares ( $P_{Ar} = 0$  mbar), red circles ( $P_{Ar} = 0.05$  mbar), blue up triangles ( $P_{Ar} = 0.1$  mbar), and green down triangles ( $P_{Ar} = 0.2$  mbar).

## S2: XRD $\theta$ - $2\theta$ scans of the series of films

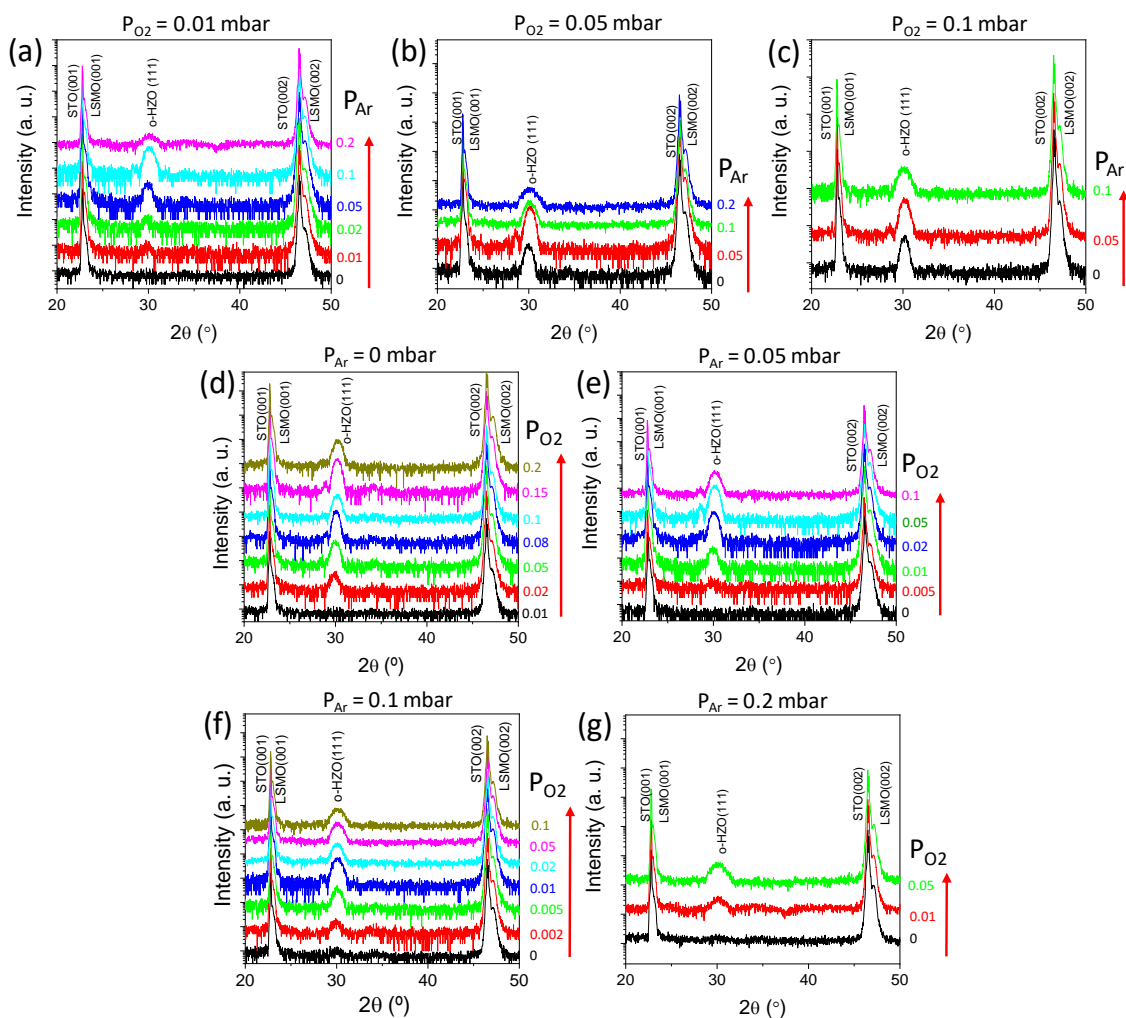

**Figure S2:** XRD  $\theta$ - $2\theta$  scans of the series of films deposited under varied  $P_{Ar}$  and fixed  $P_{O_2} = 0.01$  mbar (a),  $P_{O_2} = 0.05$  mbar (b),  $P_{O_2} = 0.1$  mbar (c), and the series of films deposited under varied  $P_{O_2}$  and fixed  $P_{Ar} = 0$  mbar (d),  $P_{Ar} = 0.05$  mbar (e),  $P_{Ar} = 0.1$  mbar (f),  $P_{Ar} = 0.2$  mbar (g).

### S3: Simulation of Laue oscillations

Figure S3 shows XRD  $\theta$ - $2\theta$  scans of selected samples around the o-HZO(111) reflection. The scans were measured using a longer time that the scans show in Figure 1. The o-HZO(111) reflection is simulated (red curves) according to the equation.<sup>1</sup>

$$I(Q) = \left( \frac{\sin\left(\frac{QNc}{2}\right)}{\sin\left(\frac{Qc}{2}\right)} \right)^2$$

where  $Q = 4\pi\sin(\theta)/\lambda$  is the reciprocal space vector,  $N$  the number of unit cells along the out-of-plane direction and  $c$  the corresponding lattice parameter.

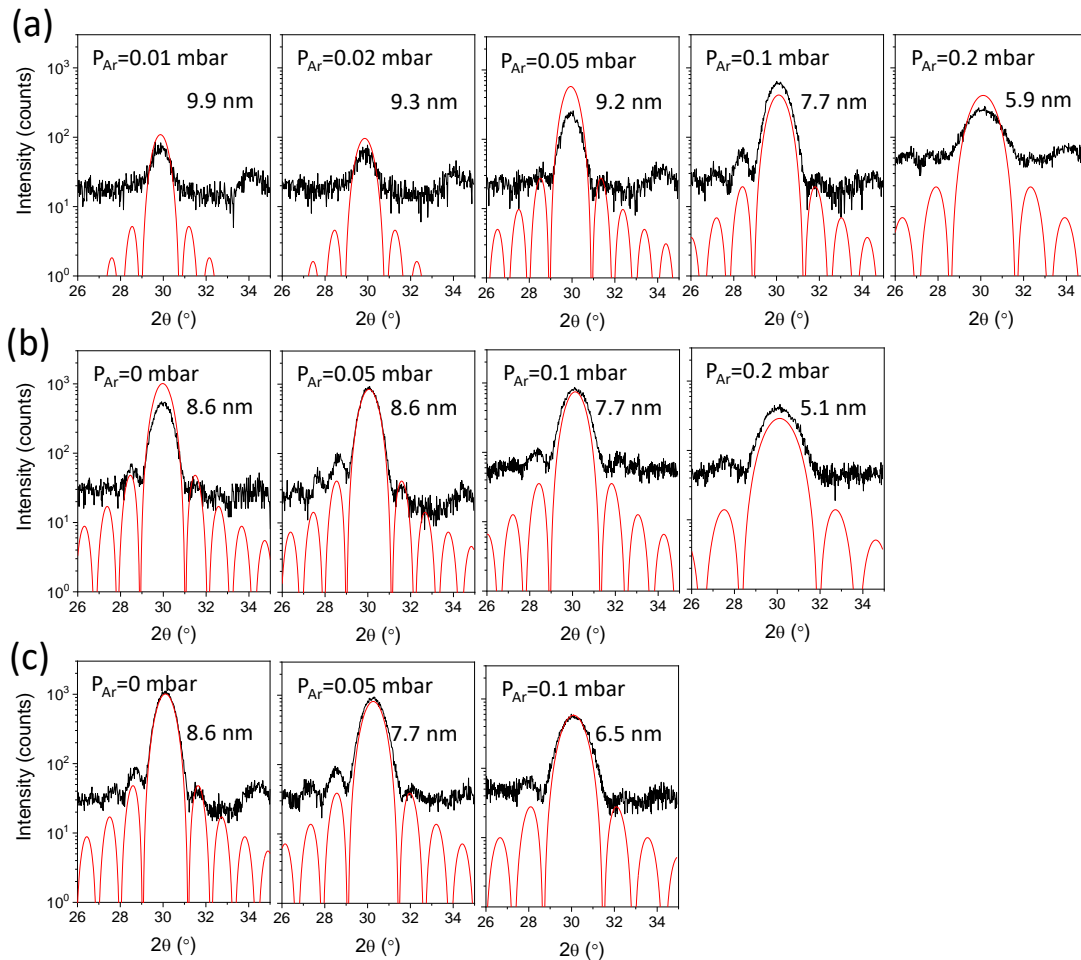

**Figure S3.** XRD  $\theta$ - $2\theta$  scans around the o-HZO(111) reflection. (a) scans of films deposited under  $P_{O_2} = 0.01$  mbar and the  $P_{Ar}$  pressure indicated in each panel. (b) scans of films deposited under  $P_{O_2} = 0.05$  mbar and the  $P_{Ar}$  pressure indicated in each panel. (c) scans of films deposited under  $P_{O_2} = 0.1$  mbar and the  $P_{Ar}$  pressure indicated in each panel. Red lines in each panel are Laue fits. The thickness estimated by the fits is indicated in the corresponding panel.

#### S4: Thickness and growth rate as a function of $P_{Ar}$

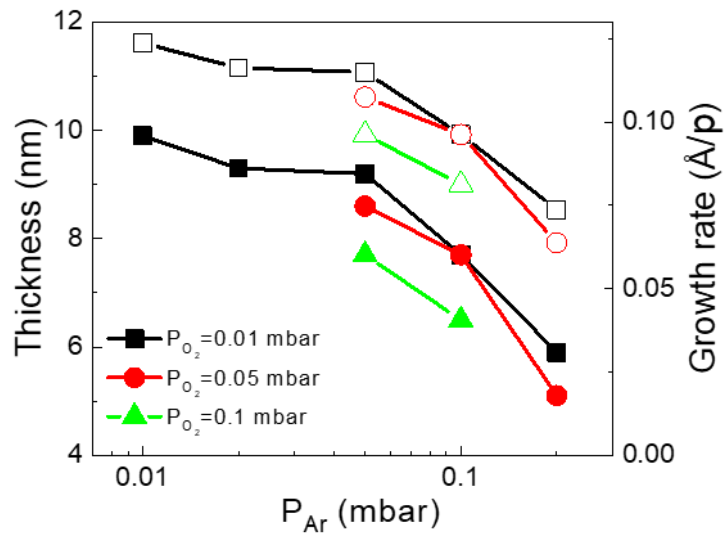

**Figure S4.** Thickness (solid symbols, left axis) and growth rate (empty symbols, right axis) as a function of  $P_{Ar}$  for fixed  $P_{O_2} = 0.01$  mbar (squares),  $P_{O_2} = 0.05$  mbar (circles) and  $P_{O_2} = 0.1$  mbar (triangles). Thickness of the films was estimated by simulation of Laue oscillations as described in Figure S3.

#### S5: XRD pole figures

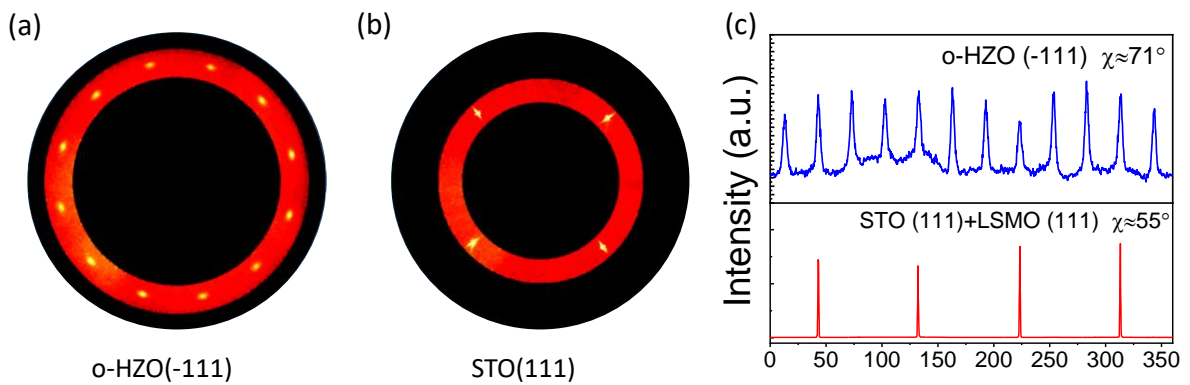

**Figure S5.** XRD pole figures of the  $P_{O_2} = 0.05$ ,  $P_{Ar} = 0.05$  mbar sample, from (a) o-HZO(-111) and (b) STO(111) reflections. (c) Corresponding  $\phi$ -scans around o-HZO(-111) and STO(111). The pole figures confirm that the orthorhombic phase is epitaxial, presenting four families of crystal variants.

### S6: Intensity of the o-(111) reflection, normalized to that of the STO(002) peak

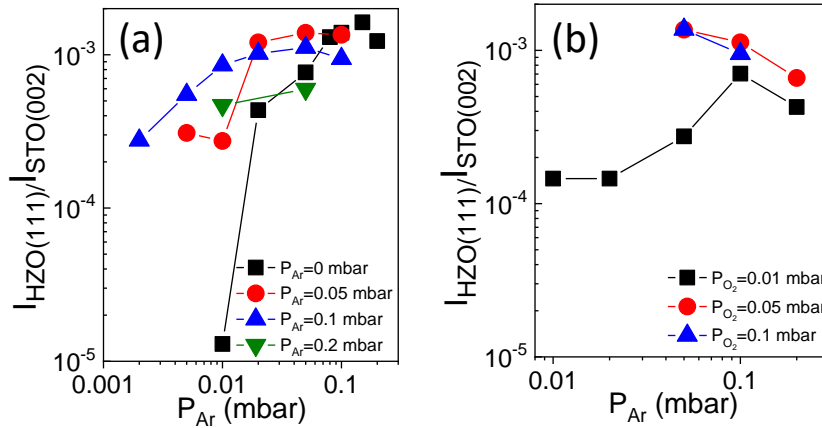

**Figure S6.** Intensity of the o-(111) reflection, normalized to that of the STO(002) peak,  $I_{\text{HZO}(111)}/I_{\text{STO}(002)}$ , as a function of  $P_{\text{O}_2}$  and  $P_{\text{Ar}}$ . In (a)  $P_{\text{Ar}}$  is: 0 mbar (black squares), 0.05 mbar (red circles), 0.1 mbar (blue up triangles), and 0.2 mbar (green down triangles). In (b)  $P_{\text{O}_2}$  is: 0.01 mbar (black squares), 0.05 mbar (red circles), and 0.1 mbar (blue up triangles). The same dependences are obtained normalizing the intensity of the o-(111) reflection to that of the LSMO(002) peak,  $I_{\text{HZO}(111)}/I_{\text{LSMO}(002)}$ , as shown in Figure 2 of the manuscript.

### S7: The normalized o-(111) reflection

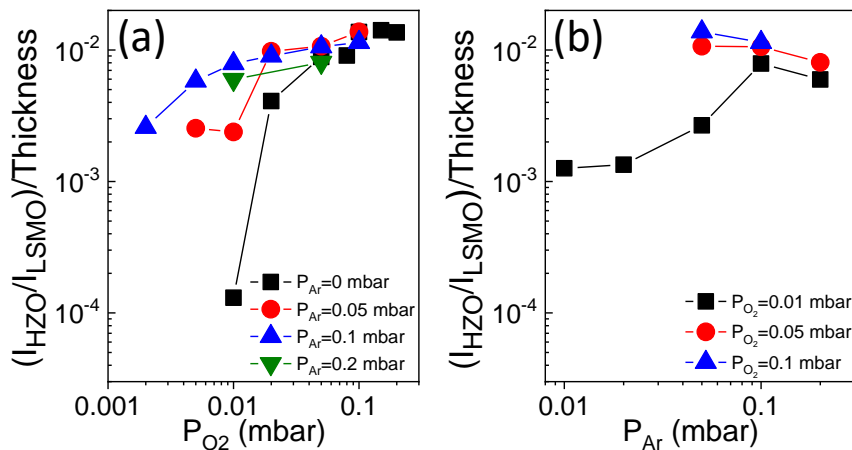

**Figure S7.** The intensity of the o-(111) reflection, normalized to that of the LSMO(002) peak,  $I_{\text{HZO}(111)}/I_{\text{LSMO}(002)}$ , shown in Figure 2 of the manuscript as a function of  $P_{\text{O}_2}$  and  $P_{\text{Ar}}$  is normalized to the film thickness. In (a)  $P_{\text{Ar}}$  is: 0 mbar (black squares), 0.05 mbar (red circles), 0.1 mbar (blue up triangles), and 0.2 mbar (green down triangles). In (b)  $P_{\text{O}_2}$  is: 0.01 mbar (black squares), 0.05 mbar (red circles), and 0.1 mbar (blue up triangles).

## S8: Leakage - voltage curves of films

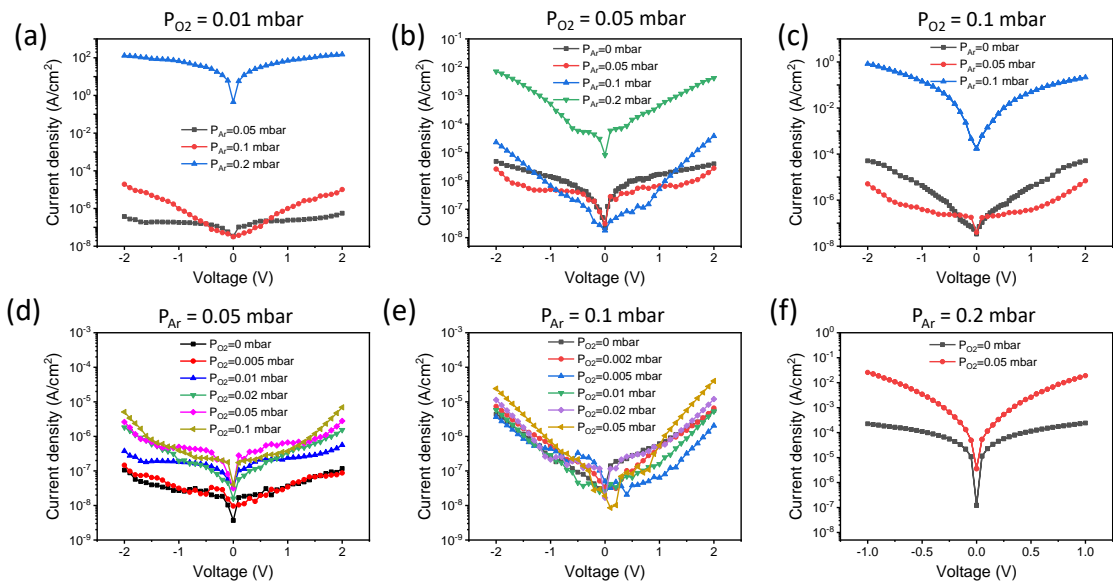

**Figure S8.** Leakage - voltage curves of films deposited under varied  $P_{Ar}$  and fixed  $P_{O_2} = 0.01$  mbar (a),  $P_{O_2} = 0.05$  mbar (b),  $P_{O_2} = 0.1$  mbar (c), and the series of films deposited under varied  $P_{O_2}$  and fixed  $P_{Ar} = 0.05$  mbar (d),  $P_{Ar} = 0.1$  mbar (e),  $P_{Ar} = 0.2$  mbar (f).

## References

- 1 J. Lyu, I. Fina, R. Solanas, J. Fontcuberta and F. Sánchez, *Appl. Phys. Lett.*, 2018, **113**, 082902.
